# Supplementary material
Source: Springer Nature journal article supplement (https://www.springermedizin.de/resource/supplementary/13037_2014_204_MOESM3_ESM.pdf/9659548)

Instrument Table 1, TOUL 300

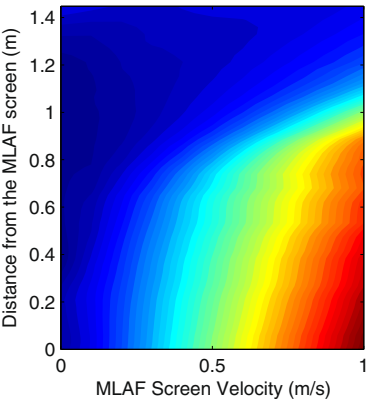

Instrument Table 2, TOUL 300

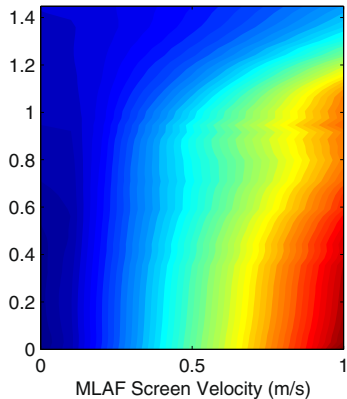

OR Table, TOUL 400

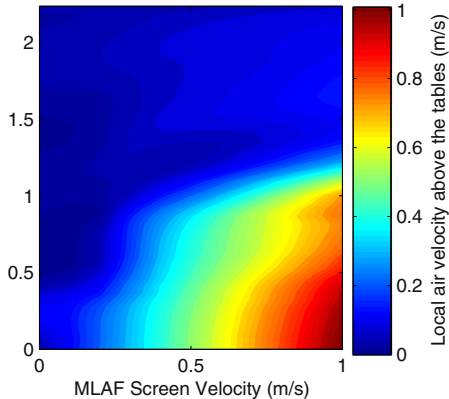

Supplement: MOESM3 [file 9659548]
